# Supplementary material
Source: HighWire-hosted journal article supplement (http://d2538ggaoe6cji.cloudfront.net/highwire/filestream/37491/field_highwire_adjunct_files/0/127779-1.pdf)
Supplement: 127779-1.pdf [file 127779-1.pdf]

## Supplementary material

### Supplementary Table S1.

Biometric and metabolic parameters of mice fed a chow diet.

| Parameter                                            | Genotype | Mean $\pm$ SEM     | <i>p</i> |
|------------------------------------------------------|----------|--------------------|----------|
| Body weight<br>(grams)                               | WT       | 23.63 $\pm$ 0.6    | 0.132    |
|                                                      | S196A    | 21.70 $\pm$ 0.75   |          |
| % Liver weight<br>(Liver g/Body g)                   | WT       | 4.69 $\pm$ 0.25    | 0.241    |
|                                                      | S196A    | 4.41 $\pm$ 0.07    |          |
| Plasma glucose<br>(mmol/L)                           | WT       | 5.35 $\pm$ 0.10    | 0.268    |
|                                                      | S196A    | 4.63 $\pm$ 0.22    |          |
| Plasma insulin<br>(ng/ mL)                           | WT       | 0.34 $\pm$ 0.05    | 0.103    |
|                                                      | S196A    | 0.87 $\pm$ 0.24    |          |
| Hepatic triglycerides<br>( $\mu$ g / mg protein)     | WT       | 51.95 $\pm$ 5.06   | 0.116    |
|                                                      | S196A    | 37.63 $\pm$ 4.50   |          |
| Hepatic total cholesterol<br>( $\mu$ g / mg protein) | WT       | 98.96 $\pm$ 10.48  | 0.688    |
|                                                      | S196A    | 104.43 $\pm$ 4 .05 |          |

## Supplementary Table S2.

Biometric and metabolic parameters of mice fed a high fat and high cholesterol diet.

| Parameter                          | Genotype     | Mean $\pm$ SEM   | p-value         |
|------------------------------------|--------------|------------------|-----------------|
| Body weight<br>(grams)             | WT           | 21.36 $\pm$ 0.41 | <b>0.012</b>    |
|                                    | <b>S196A</b> | 19.89 $\pm$ 0.35 |                 |
| % Liver weight<br>(Liver g/Body g) | WT           | 9.30 $\pm$ 0.17  | <b>3.06E-12</b> |
|                                    | <b>S196A</b> | 6.41 $\pm$ 0.18  |                 |
| Plasma glucose<br>(mmol/L)         | WT           | 4.49 $\pm$ 0.30  | 0.762           |
|                                    | <b>S196A</b> | 4.61 $\pm$ 0.24  |                 |
| Plasma insulin<br>(ng/ mL)         | WT           | 0.60 $\pm$ 0.10  | 0.498           |
|                                    | <b>S196A</b> | 0.87 $\pm$ 0.33  |                 |

## Supplementary Figure S1

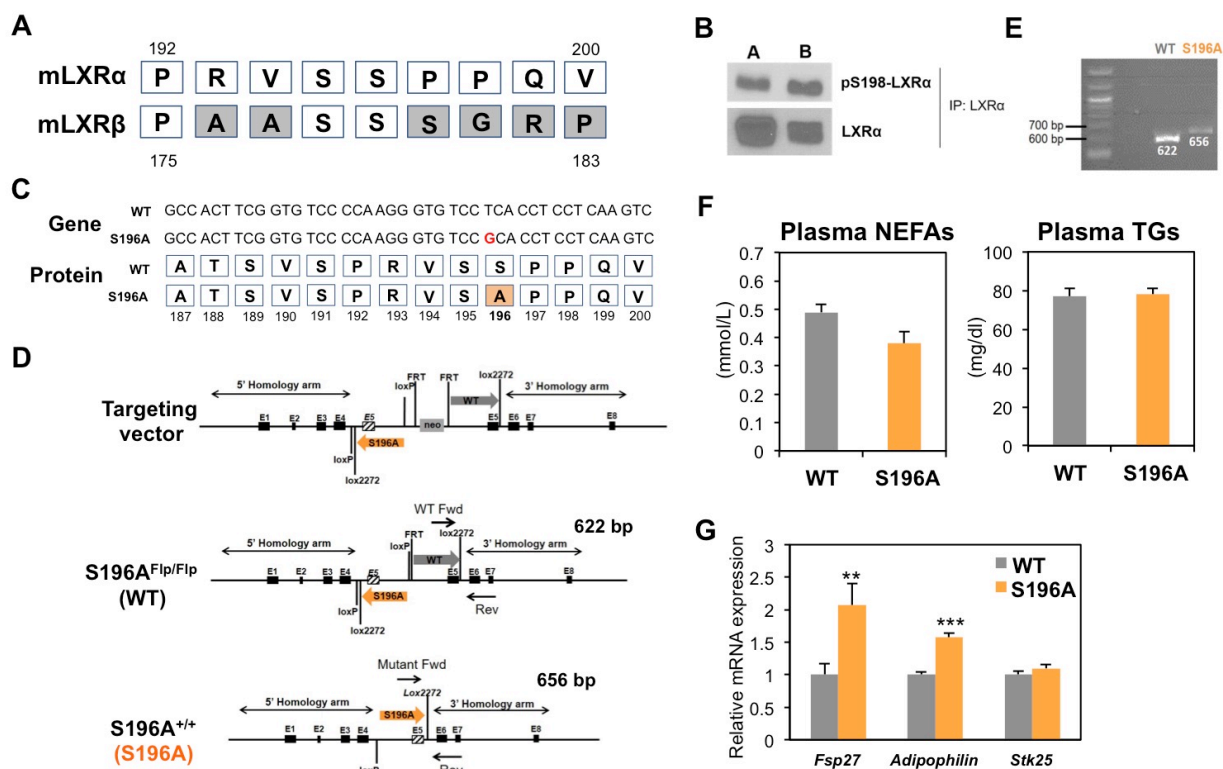

**A)** Alignment of the murine LXR $\alpha$  and LXR $\beta$  showing differences in S196 phosphorylation motifs.

**B)** LXR $\alpha$  phosphorylation at Ser198 and total LXR $\alpha$  levels in human liver lysates (n=2) by immunoblotting.

**C)** WT and S196A genomic and protein sequence alignment of the murine LXR $\alpha$  depicting the single-site mutation at S196A.

**D)** Targeting construct containing the loxP and FRT sites, the predicted homologous recombinant alleles and the resulting WT and LXR $\alpha$  knock-in locus incorporating the mutated sequence. Diagram also shows oligos used for genotyping and product size.

**E)** Gel electrophoresis of DNA amplified products using the corresponding primers.

**F)** Plasma non-esterified fatty acids (NEFAs) and triglycerides (TGs) levels from WT and S196A mice on HFHC diet (n=5-6). Data are means  $\pm$  SEM.

**G)** Hepatic gene expression of lipid droplet proteins from WT or S196A mice (n=6). Results shown normalized to cyclophilin and relative to WT set as 1.

Data represents means  $\pm$  SEM. \* p < 0.05 or \*\* p < 0.005 relative to WT determined by Student's t-test.

## Supplementary Figure S2.

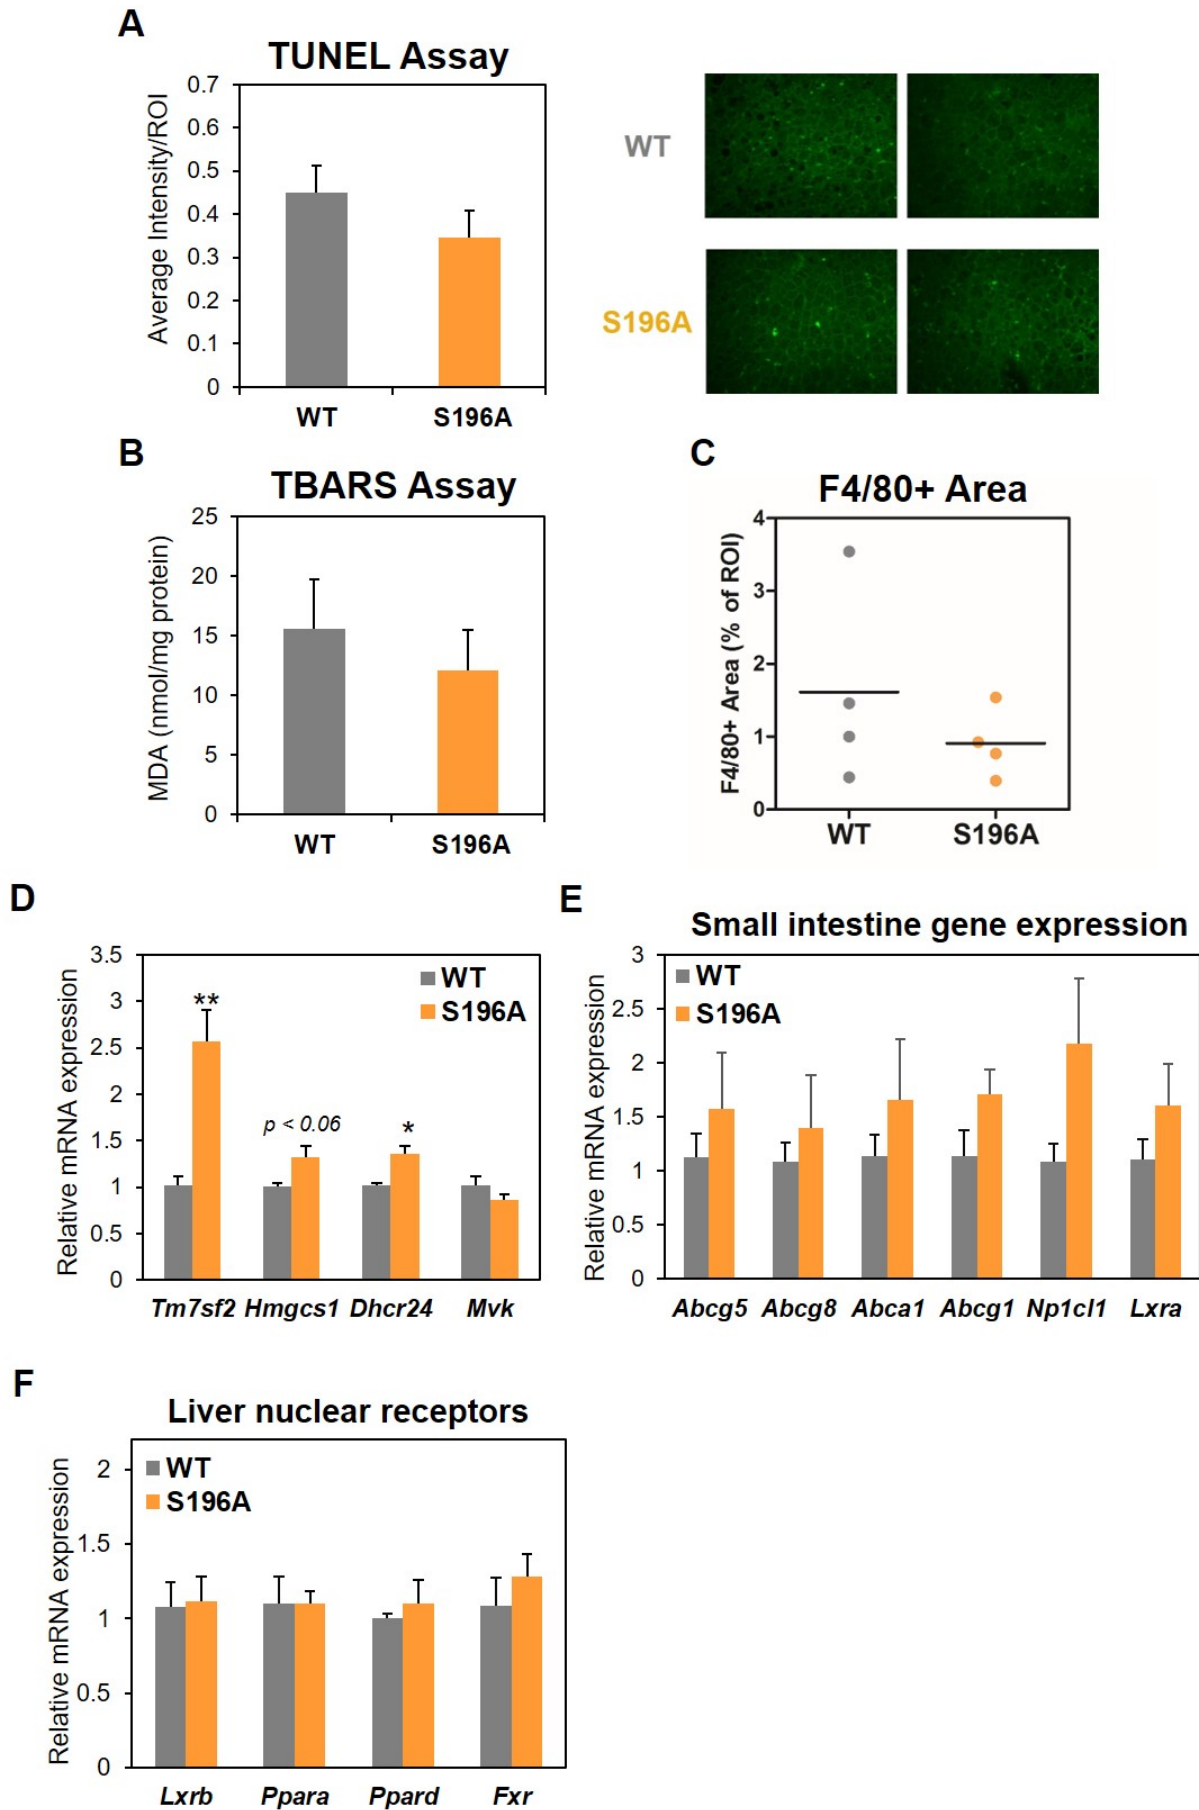

**A)** Hepatic cell apoptosis assessed *in situ* by Direct DNA Fragmentation (TUNEL) Assay (n=6) (*Right*). Representative images of TUNEL-stained liver sections from WT and S196A mice at 200x magnification (*Left*).

**B)** Hepatic lipid peroxidation shown as MDA levels in WT and S196A livers (n=6) normalised to protein levels in tissue homogenates.

**C)** Quantification of F4/80-positively stained areas in liver sections of WT and S196A mice (n=4) at 200x magnification. Dots represent average of three independent areas per animal.

**D,F)** Hepatic and **E)** Small intestine gene expression from WT or S196A mice fed a HFHC diet for 6 weeks (n=6). Results shown normalized to cyclophilin levels and relative to WT.

Data represents means  $\pm$  SEM. \*  $p < 0.05$  or \*\*  $p < 0.005$  relative to WT determined by Student's t-test.

# Supplementary Figure S3.

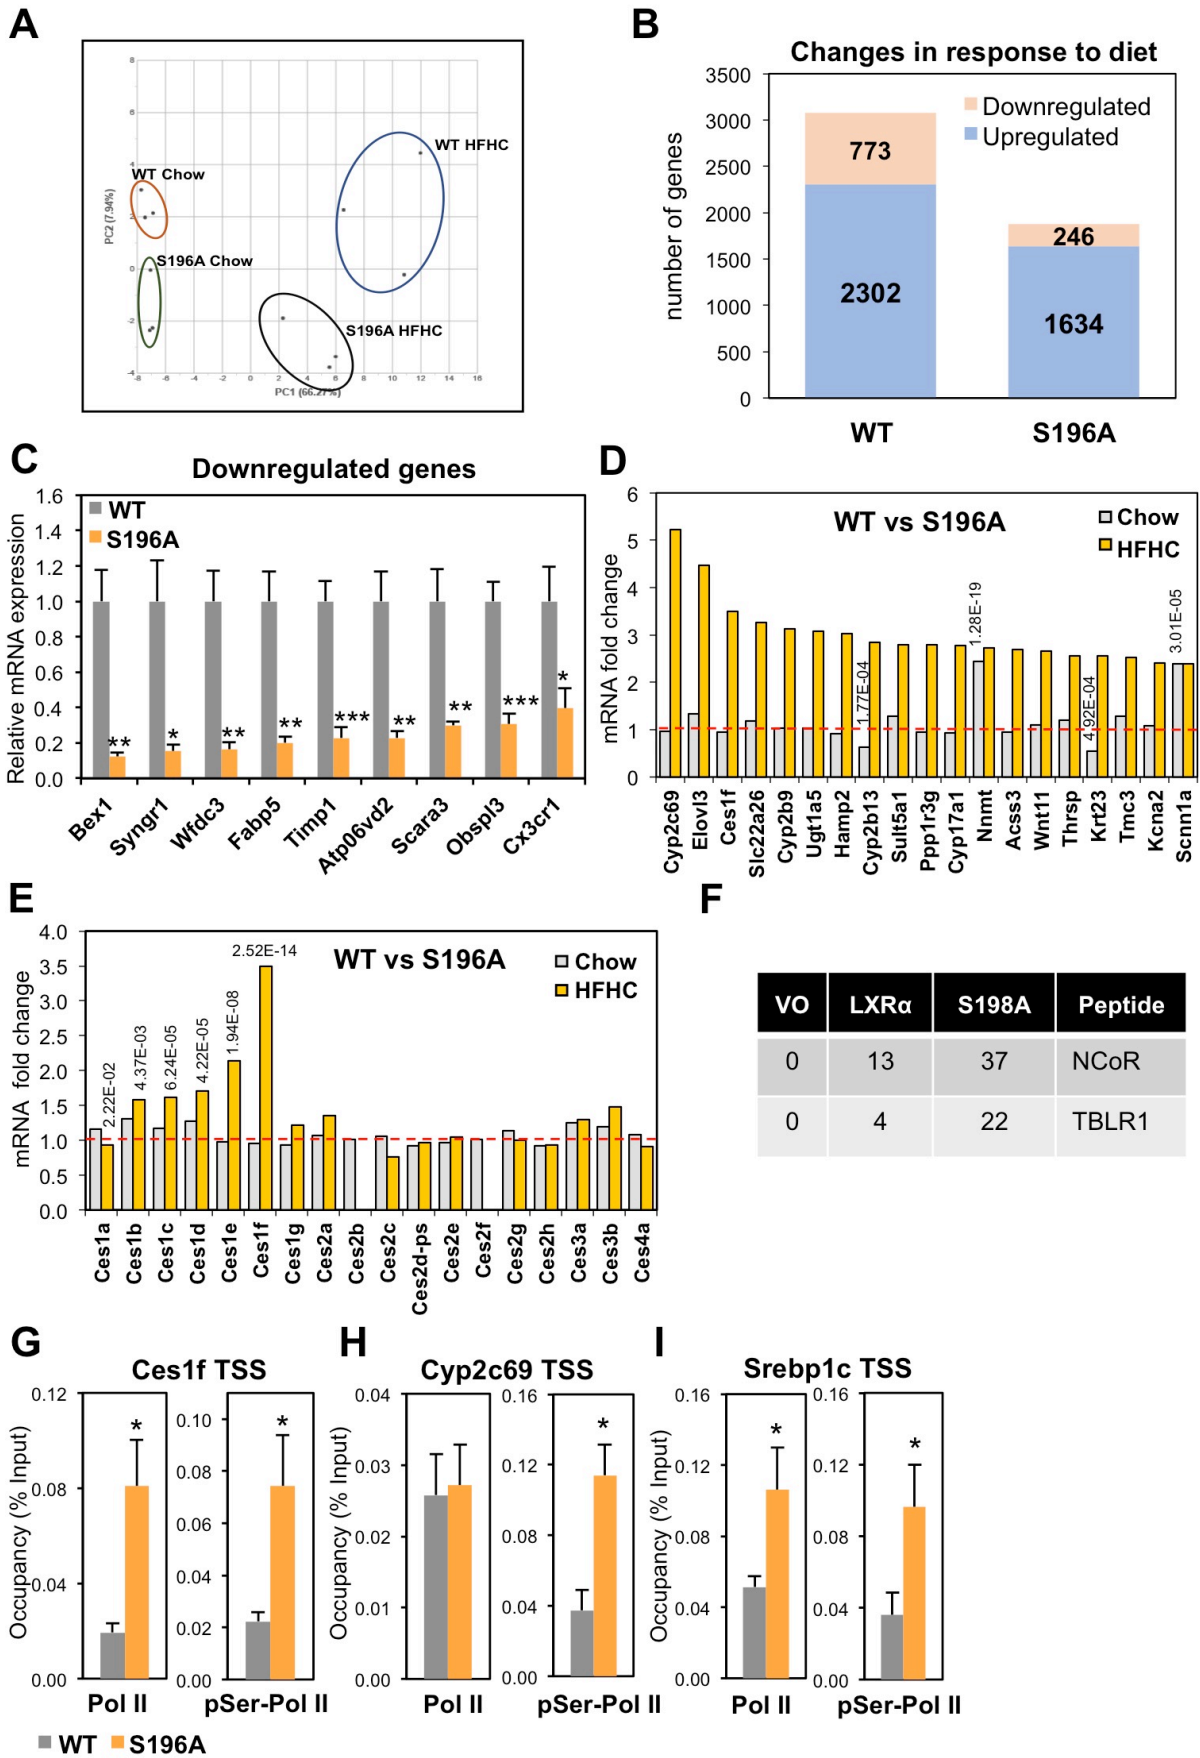

**A)** Principal Component (PC) Analysis plot showing RNAseq samples analysed by diet and genotype.

**B)** Number of genes differentially expressed between chow and HFHC-fed livers by RNAseq (n=3).

**C)** qPCR validation of top downregulated genes on experimentally-independent HFHC-fed WT and S196A livers (n=6). Results shown normalized to cyclophilin and relative to WT.

**D)** Fold-change of hepatic RNAseq gene counts of top upregulated genes comparing genotypes by diet (n=3). Shown are p values of genes differentially expressed on a chow diet.

**E)** Fold-change of hepatic RNA-Seq gene counts for Ces family members comparing genotypes by diet (n=3). Shown are p values of genes differentially expressed on a HFHC diet.

**F)** Total spectral counts obtained from immunoprecipitates of wild type LXR $\alpha$  (LXR $\alpha$ ), phospho-mutant (S198A) and not expressing LXR (VO) cells identified by mass spectroscopy.

G-I) RNA Pol II and pSer2-Pol II occupancy at Ces1f, Cyp2c69 TSS and Srebp1c TSS in livers of WT and S196A mice fed a HFHC (n=3-6).

Data represents mean  $\pm$  SEM. \* p < 0.05 relative to WT determined by Student's t-test
